1 **Modified antibiotic adjuvant ratios can slow and steer the**  
2 **evolution of resistance: co-amoxiclav as a case study**

3

4 Richard C. Allen<sup>1</sup>, Sam P. Brown<sup>2\*</sup>

5 Affiliations

6 1: Institute of Integrative Biology, ETH Zürich, CH-8092, Switzerland

7 2: School of Biological sciences, Georgia Institute of Technology 30332-0230, USA

8 \* Corresponding Author: [sam.brown@biology.gatech.edu](mailto:sam.brown@biology.gatech.edu)

9

## 10 Abstract

11 As the spread of antibiotic resistance outstrips the introduction of new antibiotics, reusing  
12 existing antibiotics is increasingly important. One promising method is to combine antibiotics  
13 with synergistically acting adjuvants that inhibit resistance mechanisms, allowing drug  
14 killing. Here we use co-amoxiclav (a commonly used and clinically important drug  
15 combination of the  $\beta$ -lactam antibiotic amoxicillin and the  $\beta$ -lactamase inhibitor clavulanate)  
16 to ask whether treatment efficacy and resistance evolution can be decoupled via component  
17 dosing modifications.

18 A simple mathematical model predicts that different ratios of these two drug components can  
19 produce distinct evolutionary responses despite similar initial levels of control. We test this  
20 hypothesis by selecting *Escherichia coli* with a plasmid encoded  $\beta$ -lactamase (ESBL CTX-  
21 M-14), against different proportions of amoxicillin and clavulanate. Consistent with our  
22 theory, we found that while resistance evolved under all conditions, the component ratio  
23 influenced both the rate and mechanism of resistance evolution. Specifically, we found that  
24 the current clinical practice of high amoxicillin to clavulanate ratios resulted in the most rapid  
25 failure due to the evolution of gene dosing responses. Increased plasmid copy number  
26 allowed *E. coli* to increase  $\beta$ -lactamase dosing and effectively titrate out the low quantities of  
27 clavulanate, restoring amoxicillin resistance. In contrast, we found high clavulanate ratios  
28 were more robust - plasmid copy number did not increase, although porin or efflux resistance  
29 mechanisms were found, as in all drug ratios. Our results indicate that by changing the ratio  
30 of adjuvant to antibiotic we can slow and steer the path of resistance evolution. We therefore  
31 suggest the use of increased clavulanate dosing regimens to slow the rate of resistance  
32 evolution.

33

## 34 Introduction

35 The current crisis of antibiotic resistance is grounded in the ability of bacterial pathogens to  
36 rapidly evolve and adapt to novel stressors like antibiotics (1). Even for the same drug many  
37 different mechanisms confer resistance, often with varying transmissibility, costs and cross  
38 resistances (2-5). Examples of resistance have been found for all currently used antibiotics  
39 and recently clinicians have begun to face pathogens that are resistant to all available  
40 antibiotics (4, 6-8).

41 In addition to the ongoing search for new drugs (9) , an important direction in combating  
42 resistance is the restoration of antibiotic sensitivity to existing drugs via the use of anti-  
43 resistance compounds or adjuvants (10-12). Antibiotic adjuvants are compounds that do not  
44 affect the growth of bacteria on their own but instead enhance the activity of antibiotics, by  
45 inhibiting mechanisms of resistance (13, 14). For example  $\beta$ -lactamase inhibitors prevent  $\beta$ -  
46 lactamase enzymes from degrading  $\beta$ -lactam antibiotics (15).  $\beta$ -lactamase mediated resistance  
47 is especially problematic for gram negative pathogens where these enzymes are common and  
48 disseminated on plasmids (10, 16, 17). Therefore  $\beta$ -lactamase  $\beta$ -lactamase inhibitor (BLBLI)  
49 combinations will restore  $\beta$ -lactam sensitivity of  $\beta$ -lactamase carrying strains without using  
50 novel antibiotics or antibiotics of last resort like carbapenems (16).

51 In this study we use co-amoxiclav (brand name Augmentin), a BLBLI combination of  
52 amoxicillin and clavulanate (clavulanic acid) that has been widely used globally since 1981  
53 (18), and is on the WHO list of essential medicines (19). Amoxicillin is a bacteriocidal  $\beta$ -  
54 lactam antibiotic that inhibits synthesis of the bacterial cell wall (17). The adjuvant  
55 clavulanate has a similar structure to  $\beta$ -lactam antibiotics and thus acts as a competitive  
56 inhibitor of many  $\beta$ -lactamase enzymes (15). By preventing amoxicillin cleavage, clavulanate  
57 suppresses the resistance phenotype making amoxicillin effective again.

58 Despite the efficacy of BLBLI combinations like co-amoxiclav resistance is still possible,  
59 either by altering the effect of amoxicillin or the effect of clavulanate. Clavulanate is  
60 ineffective against resistance mechanisms that don't involve  $\beta$ -lactamase expression. Thus  
61 direct resistance to amoxicillin, via altered penicillin binding protein structure, reduced porin  
62 expression or increased efflux pump expression can lead to resistance to co-amoxiclav (15).  
63 On the other hand increased production of lactamase enzymes overwhelm the clavulanate  
64 (20) and inhibitor resistant  $\beta$ -lactamase enzymes reduce (or abolish) the effect of clavulanate  
65 (21).

66 Despite the recent interest in adjuvants, the relative doses of the components in adjuvant  
67 therapies have received little attention, with clinical amoxicillin : clavulanate ratios varying  
68 from 2:1 to 16:1 (22), with an increase in amoxicillin more recently to combat resistance  
69 (18). Here we mathematically model and empirically map the synergy between amoxicillin  
70 and clavulanate in controlling a population of  $\beta$ -lactamase expressing *E. coli*. We then go on  
71 to demonstrate that drug ratios that are equally effective in their initial levels of control can  
72 produce distinct evolutionary responses. Specifically, we find that current high amoxicillin  
73 ratios lead to the rapid evolution of resistance via increased  $\beta$ -lactamase expression, while  
74 low amoxicillin ratios with equal initial efficacy are more robust, and maintain the efficacy of  
75 our meagre pool of  $\beta$ -lactamase inhibitors. We therefore suggest the use of increased  
76 clavulanate dosing regimens to slow the rate of resistance evolution.

77

## 78 Results

### 79 Theoretical model

80 We begin by developing a simple qualitative model for bacterial population dynamics under  
81 the control of co-amoxiclav as examples of  $\beta$ -lactam antibiotics and a  $\beta$ -lactamase inhibiting  
82 adjuvants (Figure S3, Text S1). The model predicts that the two compounds will show strong  
83 synergy when controlling a pathogen with an existing  $\beta$ -lactamase resistance gene (Figure  
84 1a), as is seen in our experimental results (Figure 1b). We next introduce two resistance  
85 mechanisms to the model, direct (non- $\beta$ -lactamase) mediated resistance via  
86 target/permeability mutations (fig 2a), or  $\beta$ -lactamase over-production (fig 2b) and ask how  
87 co-amoxiclav component dosing regimens impact selection for each mechanism.

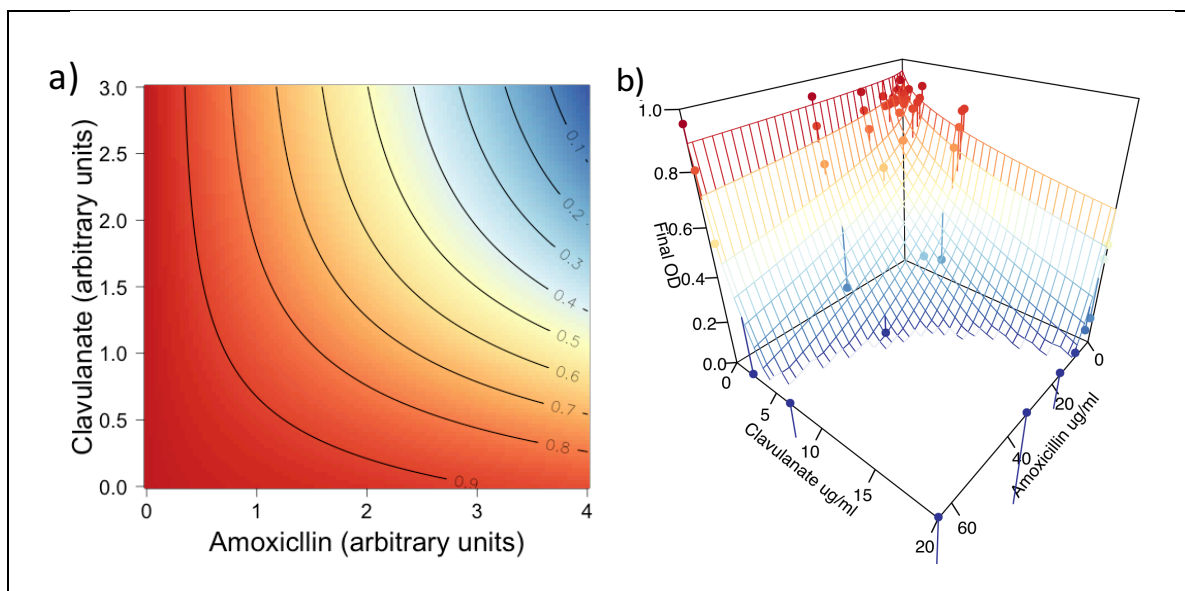

**Figure 1: A simple model of amoxicillin and clavulanate action captures observed synergy.**

a) We model the dynamics of bacterial density  $B$  under the influence of amoxicillin  $A$  and clavulanate  $C$  as  $\frac{dB}{dt} = (1 - B)B - c_z z B - c_d dB - k A B(1 - d)e^{-ze^{-C}}$  (for details, see Text S1). Carrying capacity of the system is normalised to one, so equilibrium density will be one in the absence of drugs and costly resistance. Parameters capture resistance to amoxicillin via  $\beta$ -lactamase over-production ( $z=2.3$ ). Other parameters are  $k=0.3$ ,  $d=0.1$ ,  $c_d=0.05$  and  $c_z=0.005$ . b) This model approximates the synergistic inhibition of growth seen in *E. coli* expressing a  $\beta$ -lactamase. The surface is the prediction of the fitted linear model (Figure S1).

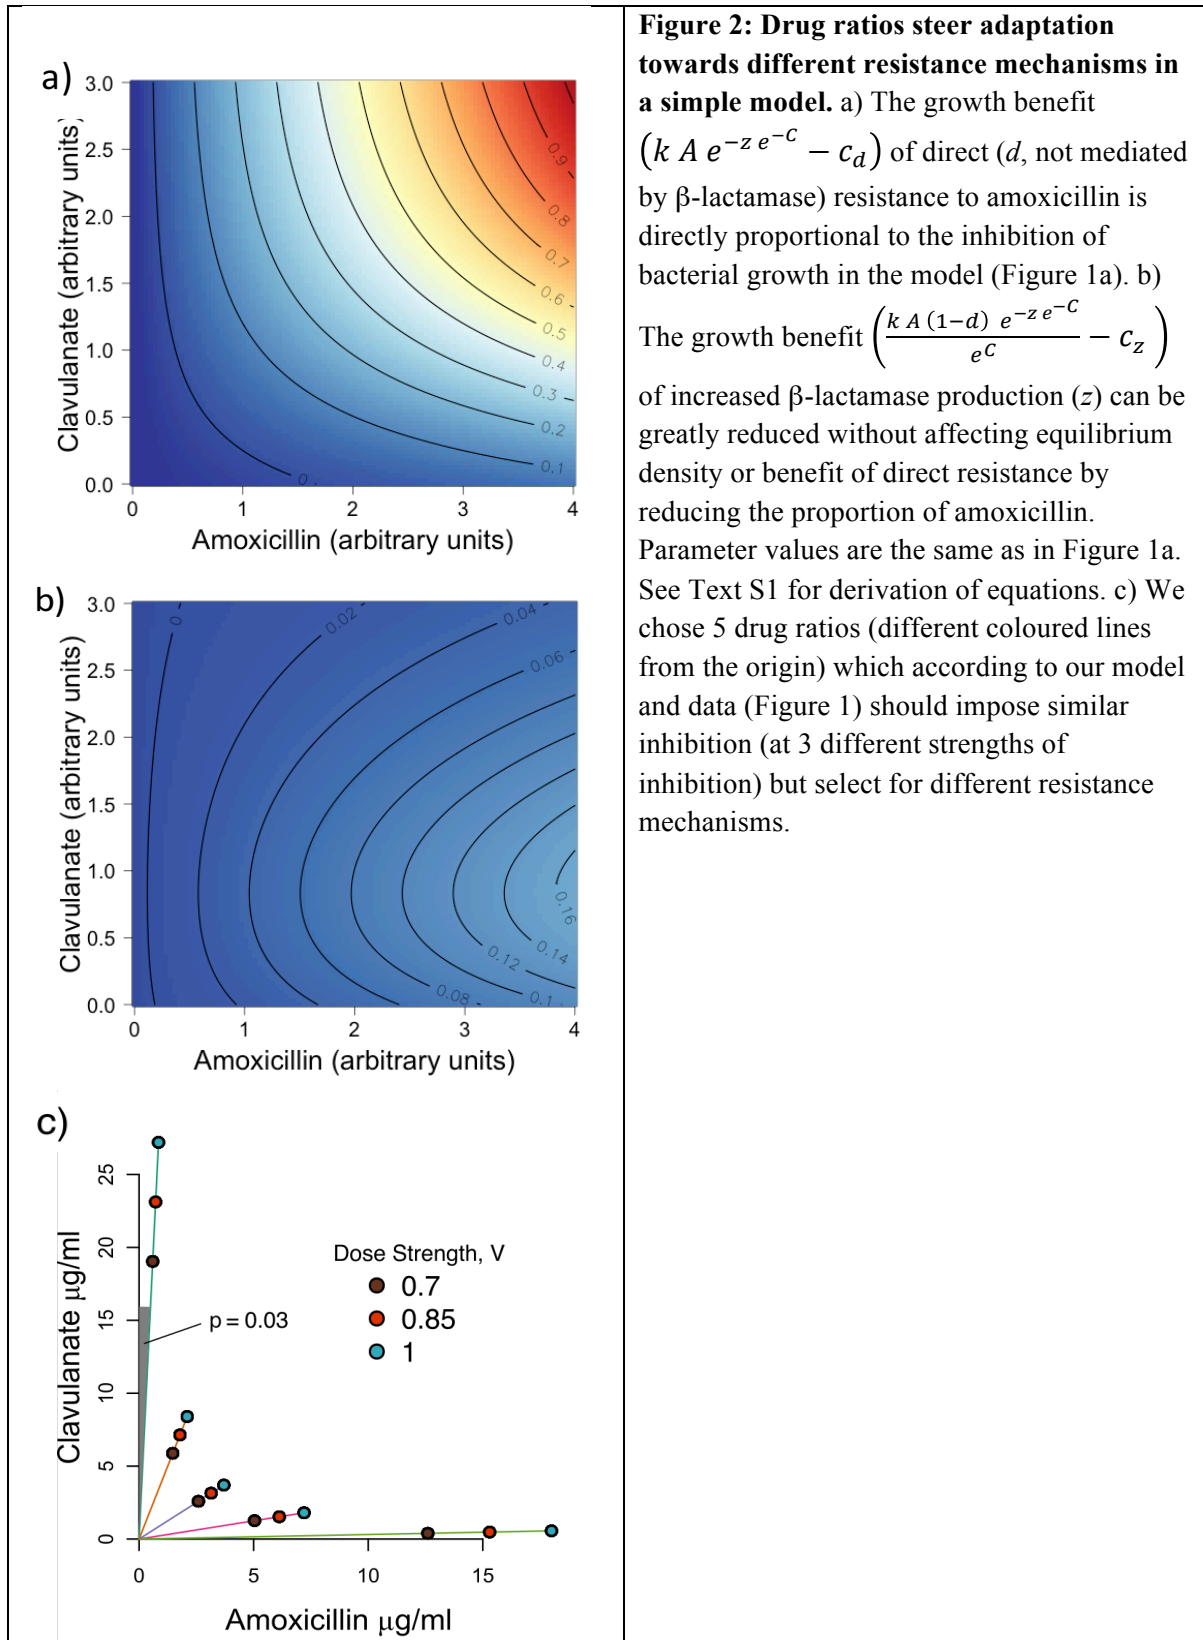

89 The model predicts that non- $\beta$ -lactamase resistance mutations will be selected in proportion  
 90 to the efficacy of the combination treatment (Figure 2a). In contrast,  $\beta$ -lactamase over-  
 91 production mutants show a more interesting pattern with maximal selection biased towards

92 high amoxicillin ratios (Figure 2b), as increasing  $\beta$ -lactamase can then effectively titrate out  
93 the low concentration of clavulanate and restore the resistance phenotype.

94

### 95 Adaptation of *E. coli* to drug environments

96 We next tested our theoretical predictions by conducting experimental evolution in 15 drug  
97 environments, corresponding to 5 differing amoxicillin proportions ( $p$ ), each at 3 dose  
98 strengths ( $V$ ) (Figure 2c). Importantly amoxicillin proportion and dose strength (strength of  
99 inhibition in the ancestor) varied independently across these 15 environments. After 6  
100 passages (approximately 40 generations) each evolved population was assayed for growth in  
101 the drug environment it was selected in. The growth of populations, in their drug  
102 environment, was greater for populations selected in high amoxicillin ratios than those  
103 selected in low amoxicillin ratios (figure 3a), even though the different drug ratios showed  
104 similar efficacy on the ancestral strain (figure S2). The slower adaptation in low amoxicillin  
105 lines can also be seen over the course of the whole selection experiment, which ran for 12  
106 passages (figure S4).

107

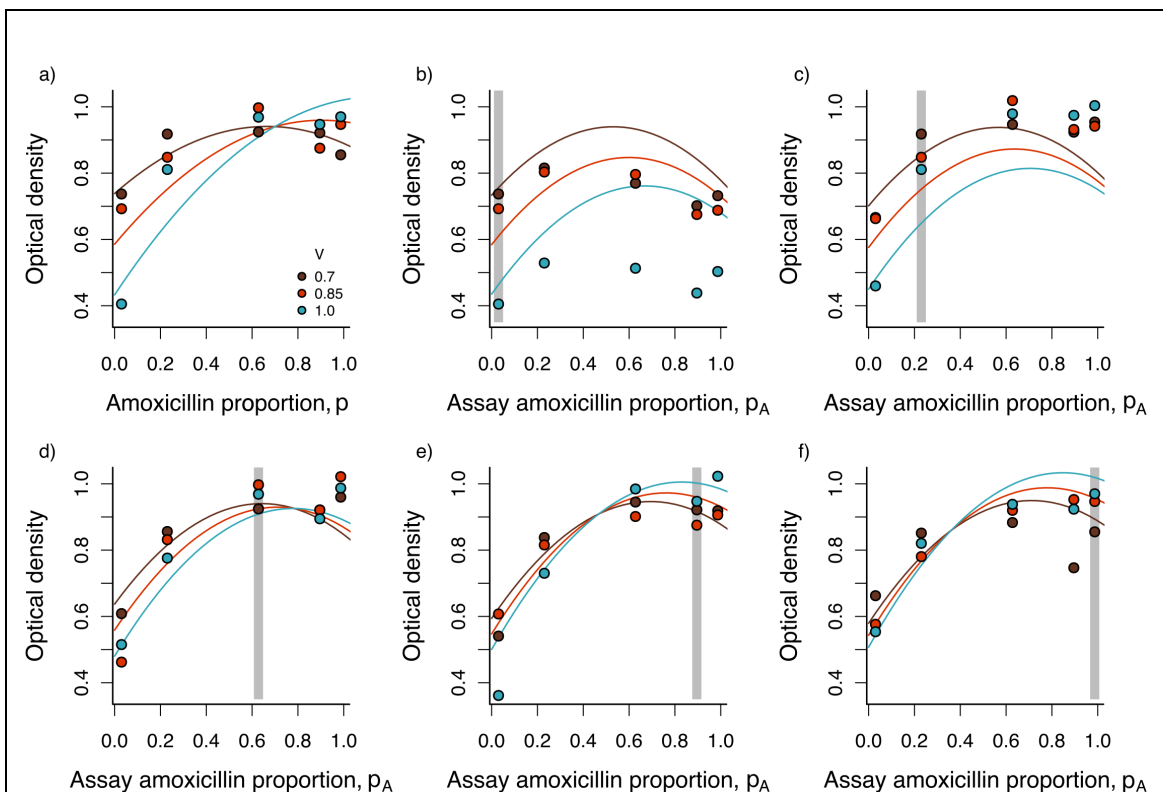

**Figure 3: Differences in the adaptation and specificity of resistance for lines evolved under**

**different amoxicillin proportions ( $p$ ).** a) shows the growth of each population its selective environment. Panels b-f) show lines evolved at different amoxicillin proportions ( $p_S$ ) from a) low  $p_S$  to f) high  $p_S$  (as depicted in figure 2c). Each line was assayed for growth at alternate drug ratios ( $p_A$ ). Colours differentiate dose strengths for both selection history and assay ( $V_S = V_A$ ). Solid curves show predicted values from the fixed effects of a minimal linear mixed effects model detailed in table S3. The grey regions indicate the drug ratio that lines were selected against, the points in these regions are shown together in panel a). Points are the mean of three replicate evolved lines.

108 Cross resistance between drug environments

109 Next, we explored how adaptation to one drug environment influenced growth across distinct  
110 drug environments. The populations that had been selected for 6 passages were exposed to  
111 alternate drug environments along the two variables of drug environment; amoxicillin  
112 proportion and dose strength.

113



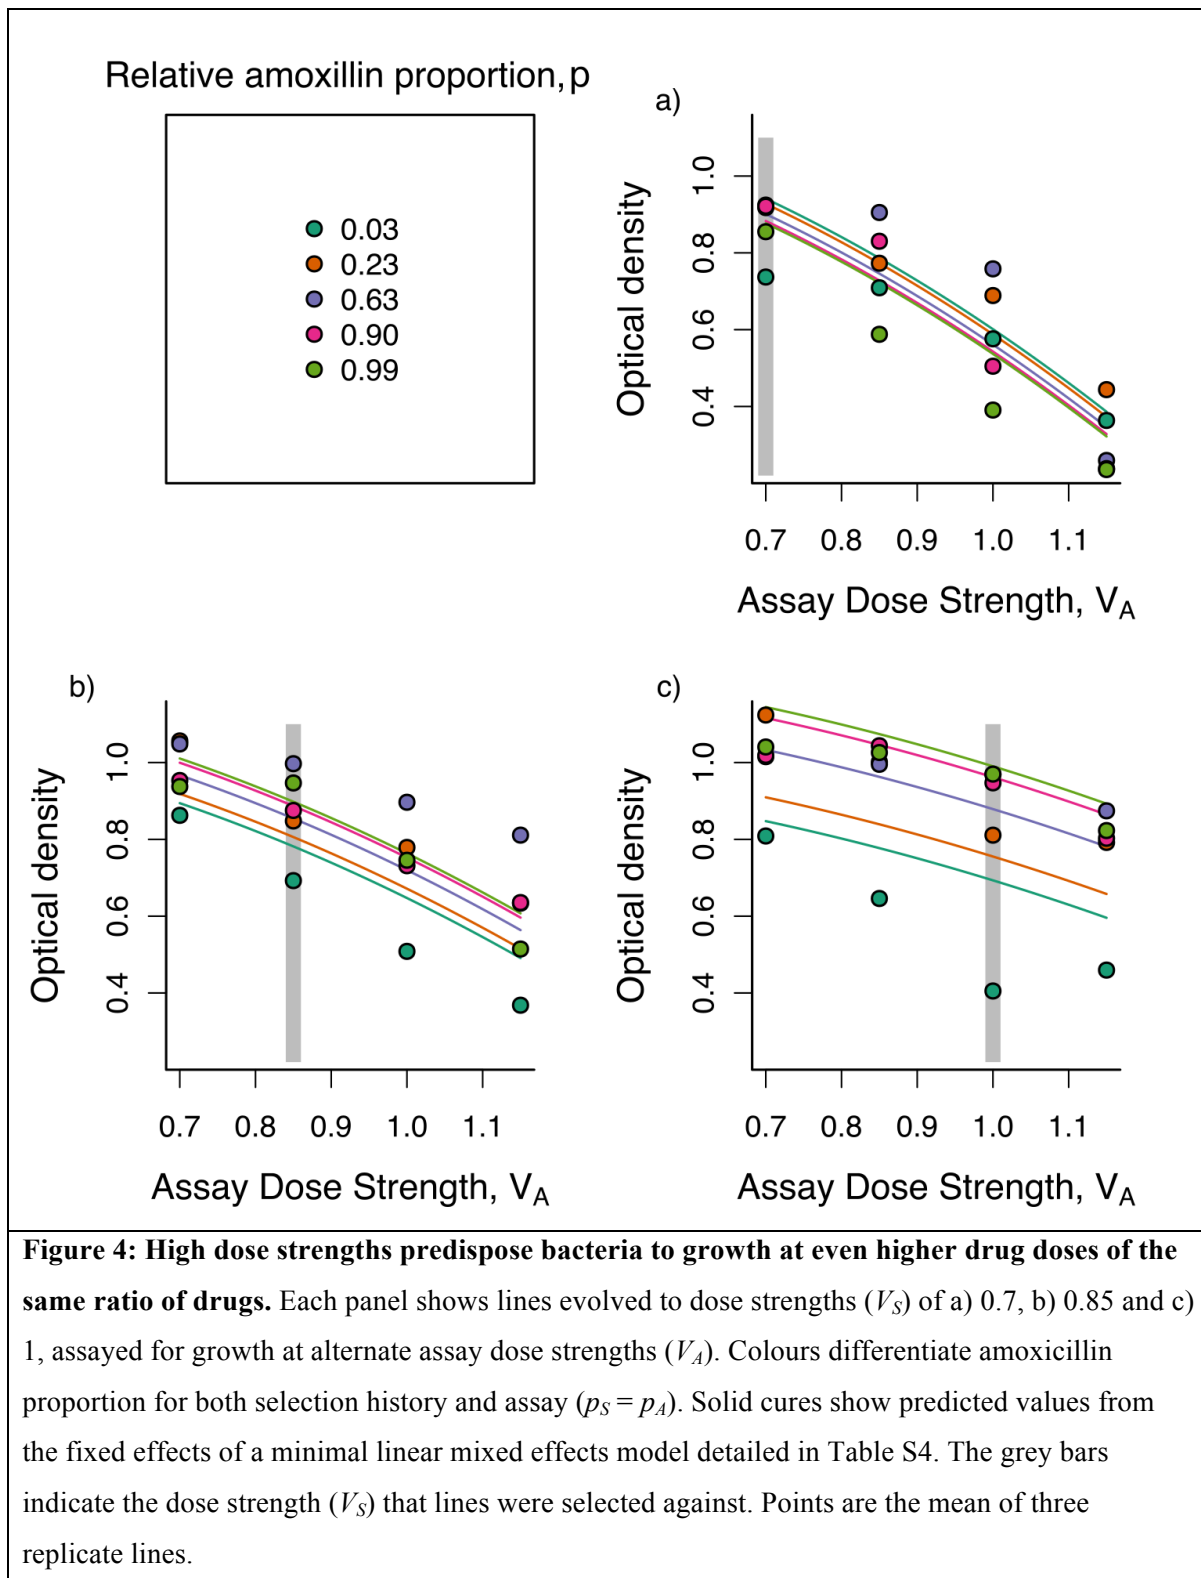

114 By varying assay amoxicillin proportion ( $p_A$ ) we found that adaptation to a high clavulanate  
 115 environment (low  $p_S$ , Figure 3b) leads to poor growth across all drug environments. Even the  
 116 complex statistical model presented here underestimates the extent that lines evolved to high  
 117 clavulanate treatments have impaired growth. In contrast, adaptation to high amoxicillin

118 environment (high  $p_S$ , Figure 3d-f) leads to performance that is more sensitive to the assay  
119 environment  $p_A$ , with high growth in the environment of adaptation and poor growth in a low  
120 amoxicillin environment, suggesting higher specificity of resistance in these lines.

121 By varying the assay dose ( $V_A$ , Figure 4) we found that adaptation to a higher dose strength  
122 environment (high  $V_S$ , Figure 4c) leads to a reduced sensitivity to increasing assay dose  
123 (Figure 4). The lines selected to different drug ratios behave similarly when assay dose  
124 strengths are changed. However, strains evolved at high clavulanate proportions do poorly  
125 against all dose strengths.

## 126 Genetic changes during selection

127 To cast light on the mechanisms of evolved resistance, we sequenced the 15 populations  
128 evolved against high dose strengths of co-amoxiclav. We find a pattern of parallel mutation  
129 of the plasmid copy number repression locus *repY* (23), predominantly in the lines evolved  
130 against high amoxicillin proportions (Figure 5, Data S1). Mutations affecting porins and  
131 efflux pumps, which prevent access of amoxicillin to the cell wall target (24), are also found  
132 in multiple lines (Figure 5, Data S1) but are not specifically found in lines evolved to high or  
133 low amoxicillin proportions. By using read depth of the plasmid and genome regions to  
134 estimate plasmid copy number we find that lines selected against higher amoxicillin  
135 proportions evolved higher plasmid copy number (Figure 6,  $\beta = 2.187$ ,  $F_{1,13} = 20.89$ ,  $p < 0.001$ ,  
136 robust to removal of outlying point).

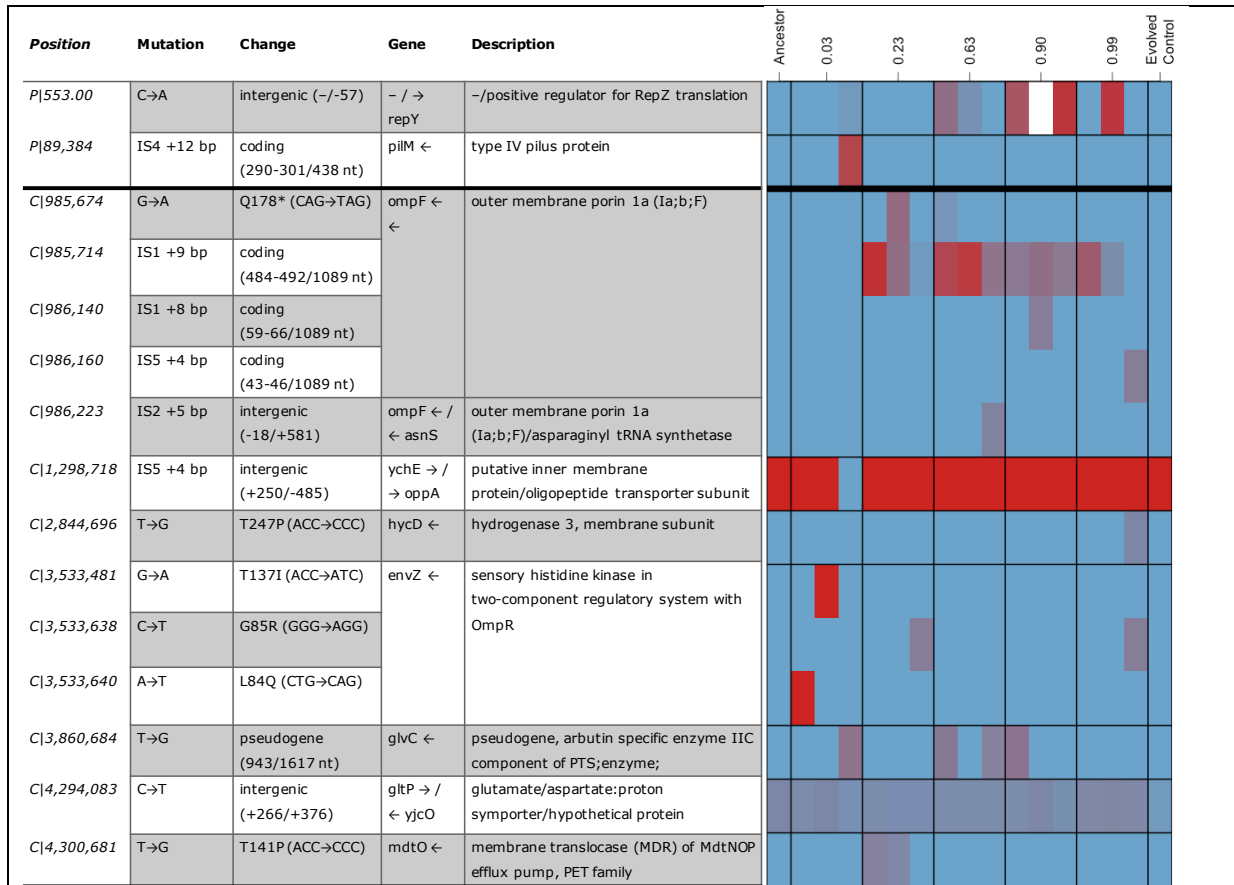

**Figure 5: Populations selected for 6 passages have different mechanisms of co-amoxiclav resistance.** The table on the left gives detail about the mutations. The frequency of each mutation in all sequenced populations is shown on the left. Red indicates that a mutation is at high frequency and blue indicates that the mutation is at low frequency or absent. The white box indicates that the mutation is present in the population but a frequency is unable to be assigned to it. Mutations are identified by their position and prefixed by P or C for plasmid or chromosome respectively. Only polymorphic mutations that were found at a frequency equal to or greater than 20% in one or more lines are shown. All mutations are listed in the Data S1.

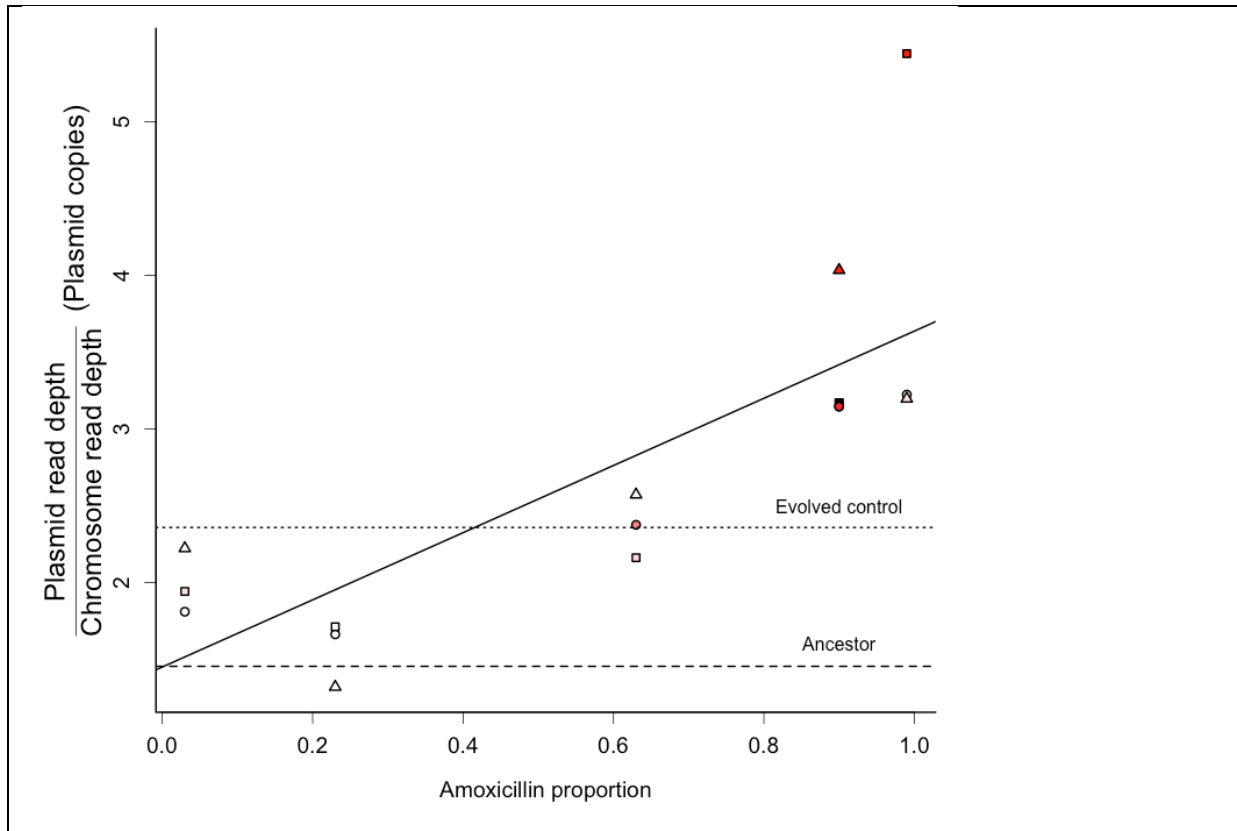

**Figure 6: Plasmid copy number is higher in lines selected at high amoxicillin proportions.** The copy number of the pCT plasmid in the first second and third replicate populations are denoted by squares, circles and triangles respectively. The strength of the red colour represents the sum of the proportion of all mutations in the *repY* promoter. Replicate 2 of the lines evolved at a relative amoxicillin proportion of 0.90 could not be quantified for the number of mutations at the *repY* promoter and is coloured black.

## 137 Discussion

138 In this study we have demonstrated that the synergistic interaction between a  $\beta$ -lactam  
139 antibiotic and a  $\beta$ -lactamase inhibitor (adjuvant) can lead to distinct phenotypic and genomic  
140 paths to resistance evolution in a ratio-dependent manner, with potential consequences for the  
141 sustainable management of adjuvant therapies. Recent work has suggested that the ratio of  
142 drugs used in combination therapies may affect selection for resistance (25-27). However  
143 drug interactions make it difficult to separate the effect of drug ratio from the inhibitory  
144 strength of the treatment, which has a well-established effect on the evolution of drug  
145 resistance (3). We find that low amoxicillin treatments confer weaker selection for resistance  
146 (Figure 3), even when the inhibitory effect of the drug combination on the ancestor is similar.  
147 As expected (3), resistance generally evolves faster when the inhibitory effect is greater

148 (figure 3 and 4), however, all lines selected in high clavulanate environments had least  
149 resistance, regardless of inhibitory effect (Figure 3a).

150 Our mathematical model (Figure 2b and S3) suggests that increased  $\beta$ -lactamase expression  
151 is more strongly selected with high proportions of amoxicillin, because when clavulanate is  
152 not in excess its effect can be titrated out by increasing lactamase expression. On the other  
153 hand selection for direct resistance only depends on the inhibitory strength of the drug  
154 combination, because this is equivalent to the amoxicillin concentration experienced by the  
155 bacterium after some proportion has been broken down by lactamase. Consistent with our  
156 model, we found that lines selected at high amoxicillin proportions grew well in high  
157 amoxicillin environments but poorly in low amoxicillin environments (Figures 3d-f). These  
158 lines had increased plasmid copy number (and thus  $\beta$ -lactamase expression) through parallel  
159 mutations in *repY* (Figure 5), which protects against amoxicillin but not in the presence of  
160 high levels of clavulanate. On the other hand, lines selected in high clavulanate environments  
161 grew poorly, but consistently across all amoxicillin proportions. These lines only acquired  
162 direct resistance to amoxicillin through parallel mutations affecting porins and efflux pumps,  
163 a resistance mechanism seen across all amoxicillin proportions. This resistance mechanism  
164 provides a benefit independent of amoxicillin proportion, as it only depends on amount of  
165 non-cleaved amoxicillin. In addition to multiple different mutations in genes with similar  
166 functions we find some identical mutations in different lines indicating that specific  
167 mutations may be adaptive as is likely the case for *repY* mutations. Mock passaged blank  
168 wells showed no evidence of cross contamination. Sequencing of a control evolved line  
169 indicated that it was also polymorphic at chromosome position 4,294,083 suggesting this  
170 polymorphism was present in the ancestral population or is an artefact of our sequence  
171 analysis.

172 Although the shape of drug interactions have recently been shown to evolve in bacteria (27),  
173 to our knowledge this is the first time that this has been reported for antibiotic adjuvant  
174 combinations, or that these changes have been linked to the mechanisms of drug action. Our  
175 results suggest that dosing regimens with higher amounts of clavulanate will more effectively  
176 slow the evolution of resistance by rendering some resistance types ineffective; specifically  
177 beta-lactamase dose-response mutations will be less able to titrate out the effect of larger  
178 amounts of beta-lactamase inhibitor. Since its introduction the dosage of amoxicillin in co-  
179 amoxiclav tablets has increased from 250mg to 875mg, to combat amoxicillin resistance,  
180 however the dosage of clavulanate has remained the same at 125mg. There are many other

181 considerations when designing dosing regimens including pharmacokinetics/  
182 pharmacodynamics and toxicity (although amoxicillin and clavulanate are well tolerated, (28,  
183 29)), but the potential for resistance is increasingly important. Increased  $\beta$ -lactamase  
184 expression is a common resistance mechanism, particularly when plasmid borne (20).  
185 Therefore, we suggest that the amount of clavulanate could be increased to reduce selection  
186 for increased lactamase expression without affecting the fitness of other resistance  
187 mechanisms. This would have the added benefit of reducing selection for plasmid based  
188 resistance, which is both easily mobilised and can increase evolvability (20).

189 As our supply of antibiotics becomes limited there has been greater interest in extending the  
190 lifetime of antibiotics through combination with adjuvants, and  $\beta$ -lactams are no exception  
191 (9). As antibiotics have been developed for longer than adjuvants we have many  $\beta$ -lactam  
192 antibiotics which could be more effective if combined with an adjuvant but relatively few  $\beta$ -  
193 lactamase inhibitors to combine them with (15). Therefore, it has been argued that adjuvants  
194 should be conserved over antibiotics (13), with the antibiotic component of a combination  
195 being replaced when resistance renders it ineffective through direct resistance mechanisms.  
196 Our results with co-amoxiclav suggest that using  $\beta$ -lactamase inhibitors at high  
197 concentrations would do exactly this by steering resistance away from  $\beta$ -lactamase over-  
198 expression and towards direct mechanisms of resistance – at which point the  $\beta$ -lactam  
199 component could in principle be replaced. In practice, the potential enrichment of broad-  
200 specificity resistance mechanisms will limit the set of replacement options. In general we  
201 argue that our ability to manage infections on both the patient and public health scales will  
202 require greater investment into the evolutionary consequences of existing and potential  
203 treatment regimens.

## 204 Methods

### 205 Strains and media

206 *Escherichia coli* strain MG1655 containing a naturally occurring pCT plasmid (30) and  
207 defective for horizontal transfer due to a mutation in the *trbA* gene (31) was used as the  
208 ancestor of all selection lines and is henceforth referred to as the ancestor. The strain was  
209 produced in the lab of Dr Ben Raymond (31) and kindly provided. The pCT plasmid is a  
210 large naturally occurring plasmid containing the CTX-M-14 extended spectrum  $\beta$ -lactamase.  
211 The pCT plasmid is stable, however prior to incubation for experimental evolution and  
212 growth dynamics assays the ancestor was grown in the presence of 100 $\mu$ g/ml ampicillin to

213 maintain the pCT plasmid. For phenotyping of experimentally evolved strains pre-culture  
214 was without antibiotics to reduce any non-genetic effects of exposure to antibiotic treatment.

215 Experimental evolution was conducted in a defined minimal medium with the following  
216 recipe. M9 medium base (containing 6.78 mg/ml Na<sub>2</sub>HPO<sub>4</sub>, 3 mg/ml KH<sub>2</sub>PO<sub>4</sub>, 0.5 mg/ml  
217 NaCl and 1 mg/ml NH<sub>4</sub>Cl) supplemented with 1mM MgSO<sub>4</sub>, 0.1mM CaCl<sub>2</sub>, 0.4% (v/v)  
218 glycerol, 0.02% casamino acids, 0.5µg/ml thiamine and Hutners trace elements (32) at 1X  
219 concentration. Initial checkerboard assays were conducted in Luria Bertani (LB) broth.

220 Clavulanate (in the form of potassium clavulanate, Fluca analytical) and amoxicillin (LKT  
221 laboratories) were supplied in powdered forms, stored at 4°C and used to make stocks in  
222 deionised water. These stocks were stored at 4°C according to manufacturer's instructions,  
223 liquid stocks were not kept for longer than 14 days to minimise degradation of the  
224 compounds.

225 To test antibiotic sensitivity of the ancestral strain the ancestor was grown for 22 hours in LB  
226 broth in the presence of increasing clavulanate and amoxicillin, at all possible combinations  
227 of the two drug concentrations (checkerboard assay, Figures 1b and S1). From these 5  
228 different ratios of amoxicillin and clavulanate, as well as associated iso-inhibitory doses were  
229 identified for each ratio. These were tested in minimal medium to confirm that growth was  
230 not significantly affected by drug ratio, but was affected by the strength of the drug dose  
231 (figure S2). The chosen concentrations and relationships between them are shown in Figure  
232 2c.

### 233 Experimental evolution

234 To test its ability to adapt to different drug doses, *E coli* was selected against varying drug  
235 regimens defined by the relative proportion of amoxicillin (p Selection, p<sub>s</sub>) and dose strength  
236 (V<sub>s</sub>), as in figure 2c. A mid exponential culture the ancestor was washed and diluted in  
237 minimal medium. This was aliquotted into 48 wells in the centre of a 96 well plate, which  
238 were then made up to a final volume of 200µl by adding reconstituted clavulanate and  
239 amoxicillin, starting densities were OD = 0.01. Experimental evolution lines were set up  
240 corresponding to 5 drug ratios at 3 different strengths, plus one line which was not exposed to  
241 drugs, each replicated 3 times (48 independent lines), plus 3 replicate sterile wells with no  
242 drugs (which were still passaged). Plates were incubated statically at 37°C for 22 hours for  
243 each passage. After each growth cycle wells were mixed using a pipette to re-suspend any  
244 clumps of bacteria. The optical density of the wells was then measured and used to transfer



245 cells to a fresh microwell plate so that each line started at an OD (600nm) of 0.01.  
246 Experimental evolution was performed for 12 passages (corresponding to approximately 84  
247 generations). Lines were frozen every 3 passages by adding 100 $\mu$ l of a 1:1 LB:glycerol  
248 mixture to the remaining culture after the transfer had been performed, these were then frozen  
249 at -80°C.

## 250 Measuring cross resistance between drug environments

251 Although final density was measured at the end of each passage, the growth of frozen  
252 samples was used primarily used to assess variation in resistance phenotypes across  
253 populations (removing long term physiological effects of antibiotic exposure). To assay  
254 evolutionary change in response to drug combinations, for each line the population after 6  
255 passages (chosen because this is when there was most diversity in how lines had adapted to  
256 their environment) was revived by overnight growth in LB. Each line of selection was  
257 assayed for growth in new drug environments (Assay environments,  $p_A$ ,  $V_A$ ). The differing  
258 drug environments that selection lines were assayed against either kept amoxicillin  
259 proportion the same ( $p_A = p_S$ ) and varied dose strength ( $V_A$ ) or kept dose strength the same  
260 ( $V_A = V_S$ ) and varied amoxicillin proportion ( $p_S$ ). When varying dose strength an increased  
261 dose of 1.15 times the maximum dose was also used ( $V_A=1.15$ ). Otherwise all conditions  
262 were the same, strains were grown in minimal media statically for 22 hours at 37°C and  
263 mixed prior to measuring optical density.

264 This was a large experiment so selection lines were randomly blocked across the central  
265 wells of nine 96 well plates. Each plate had three blank wells and one well containing each of  
266 the 3 control lines selected in the absence of drugs and assayed in the absence of drugs. There  
267 was small but significant variation in the growth of control lines across plates so OD values  
268 were for each plate were corrected using the growth of controls (in the absence of drugs).  $p_S$   
269 is undefined for the control lines (selected without drugs) so these were tested against every  
270 different drug environment.

## 271 Statistics

272 All statistics were performed in R (33). Full models were produced using relevant main  
273 effects and interactions (statistical tables in supplementary information). Fixed effects models  
274 were fitted using the glm function with a Gaussian error distribution and identity link  
275 function. For data sets where multiple measures were taken from each strain, a mixed effects  
276 model was used to take into account the effect of strain as a random effect, this was fitted



277 using the lme function in the nlme package (34). As there were many explanatory variables  
278 for this data, 2 models are fitted to 2 subsets of the data. One data set includes all data where  
279 strains are tested for resistance to the same dose strength they are selected against (at varying  
280 drug ratios). This will investigate whether resistance evolved to one drug ratio confers  
281 resistance to other drug ratios. The other set includes all data where strains are tested for  
282 resistance to the same ratio they were selected against (at different dose strengths). This  
283 model investigates whether resistance selected at one dose strength confers resistance to  
284 others. Both these data sets include the 45 data points (one per evolved line) where both ratio  
285 and strength of assay are the same as those for selection (i.e the selection conditions for that  
286 line).

287 The maximal model was reduced to a minimal model in a stepwise manner. At each step of  
288 model reduction all terms that were not currently included in an interaction were tested for  
289 significance as grounds for including them in a model. Terms were dropped if the result of an  
290 F test (for fixed effects models) or likelihood ratio test (for mixed effects models) comparison  
291 of models with and without the term of interest was not significant at  $\alpha=0.05$  (i.e. accepting  
292 the null hypothesis of no significant effect of the term). At each step only one term could be  
293 dropped so where several effects were non-significant the new model with the lowest AiC  
294 (Akaike information criterion) was chosen as the best model reduction at that step. When no  
295 terms (not included in higher order interactions) could be dropped without a significant effect  
296 this was considered the minimal model. Statistical support for all terms in the minimal  
297 models was assessed as above but through comparison of the minimal model and the minimal  
298 model with the term dropped. Full statistical results are reported in statistical tables in the  
299 supplementary information.

### 300 Sequencing and Bioinformatics

301 To test whether different drug ratios select for different resistance mutations we sequenced  
302 evolved populations selected against the highest dose strengths after 6 passages of  
303 experimental evolution. The ancestral strain and one of the 3 populations evolved in the  
304 absence of drugs was also sequenced. Library preparation and paired end MiSeq sequencing  
305 was performed by Edinburgh genomics. Obtained sequences were aligned to both the  
306 MG1655 reference (35) and the pCT plasmid reference (30) and polymorphisms identified  
307 using breseq in polymorphism mode using default parameters (36).

### 308 Bibliography

- 309 1. **Toprak E, Veres A, Michel J-B, Chait R, Hartl DL, Kishony R.** 2011. Evolutionary  
310 paths to antibiotic resistance under dynamically sustained drug selection. *Nature*  
311 *Genetics* **44**:101–105.
- 312 2. **Hughes D, Andersson DI.** 2015. Evolutionary consequences of drug resistance:  
313 shared principles across diverse targets and organisms. *Nature Publishing Group*  
314 **16**:459–471.
- 315 3. **Oz T, Guvenek A, Yildiz S, Karaboga E, Tamer YT, Mumcuyan N, Ozan VB,**  
316 **Senturk GH, Cokol M, Yeh P, Toprak E.** 2014. Strength of Selection Pressure Is an  
317 Important Parameter Contributing to the Complexity of Antibiotic Resistance  
318 Evolution. *Molecular Biology and Evolution* **31**:2387–2401.
- 319 4. **Liu YY, Wang Y, Walsh TR, Yi LX, Zhang R.** 2016. Emergence of plasmid-  
320 mediated colistin resistance mechanism MCR-1 in animals and human beings in  
321 China: a microbiological and molecular biological study. *The Lancet infectious* ....
- 322 5. **MacLean RC, Hall AR, Perron GG, Buckling A.** 2010. The population genetics of  
323 antibiotic resistance: integrating molecular mechanisms and treatment contexts. *Nature*  
324 *Reviews Genetics* **11**:405–414.
- 325 6. **Woods RJ, Read AF.** 2015. Clinical management of resistance evolution in a  
326 bacterial infection: A case study. *Evolution, Medicine, and Public Health* **2015**:281–  
327 288.
- 328 7. **Chen L, Todd R, Kiehlbauch J, Walters M, Kallen A.** 2017. Notes from the Field:  
329 Pan-Resistant New Delhi Metallo-Beta-Lactamase-Producing *Klebsiella pneumoniae* -  
330 Washoe County, Nevada, 2016. *MMWR Morb Mortal Wkly Rep* **66**:33.
- 331 8. **McCarthy M.** 2017. Woman dies after infection with bacteria resistant to all  
332 antibiotics available in US. *BMJ* **356**.
- 333 9. **Ling LL, Schneider T, Peoples AJ, Spoering AL, Engels I, Conlon BP, Mueller A,**  
334 **Schäberle TF, Hughes DE, Epstein S, Jones M, Lazarides L, Steadman VA,**  
335 **Cohen DR, Felix CR, Fetterman KA, Millett WP, Nitti AG, Zullo AM, Chen C,**  
336 **Lewis K.** 2015. A new antibiotic kills pathogens without detectable resistance. *Nature*  
337 1–18.
- 338 10. **King AM, Reid-Yu SA, Wang W, King DT, De Pascale G, Strynadka NC, Walsh**  
339 **TR, Coombes BK, Wright GD.** 2014. Aspergillomarasmine A overcomes metallo- $\beta$ -  
340 lactamase antibiotic resistance. *Nature* **510**:503–506.
- 341 11. **Christensen LD, van Gennip M, Jakobsen TH, Alhede M, Hougen HP, Hoiby N,**  
342 **Bjarnsholt T, Givskov M.** 2012. Synergistic antibacterial efficacy of early  
343 combination treatment with tobramycin and quorum-sensing inhibitors against  
344 *Pseudomonas aeruginosa* in an intraperitoneal foreign-body infection mouse model.  
345 *Journal of Antimicrobial Chemotherapy* **67**:1198–1206.
- 346 12. **Stokes JM, MacNair CR, Ilyas B, French S, Côté J-P, Bouwman C, Farha MA,**  
347 **Sieron AO, Whitfield C, Coombes BK, Brown ED.** 2017. Pentamidine sensitizes  
348 Gram-negative pathogens to antibiotics and overcomes acquired colistin resistance.  
349 *Nature Microbiology* **2**:17028.

- 350 13. **Gill EE, Franco OL, Hancock REW.** 2014. Antibiotic Adjuvants: Diverse Strategies  
351 for Controlling Drug-Resistant Pathogens. *Chemical Biology & Drug Design* **85**:56–  
352 78.
- 353 14. **Melander RJ, Melander C.** 2017. The Challenge of Overcoming Antibiotic  
354 Resistance: An Adjuvant Approach? *ACS Infect Dis.*
- 355 15. **Drawz SM, Bonomo RA.** 2010. Three decades of beta-lactamase inhibitors. *Clinical*  
356 *Microbiology Reviews* **23**:160–201.
- 357 16. **Harris PNA, Tambyah PA, Paterson DL.** 2015.  $\beta$ -lactam and  $\beta$ -lactamase inhibitor  
358 combinations in the treatment of extended-spectrum  $\beta$ -lactamase producing  
359 Enterobacteriaceae: time for a reappraisal in the era of few antibiotic options? *The*  
360 *Lancet Infectious Diseases* **15**:475–485.
- 361 17. **Babic M, Hujer AM, Bonomo RA.** 2006. What's new in antibiotic resistance? Focus  
362 on beta-lactamases. *Drug Resistance Updates: Reviews and Commentaries in*  
363 *Antimicrobial and Anticancer Chemotherapy* **9**:142–156.
- 364 18. **White AR, Kaye C, Poupard J, Pypstra R, Woodnutt G, Wynne B.** 2004.  
365 Augmentin (amoxicillin/clavulanate) in the treatment of community-acquired  
366 respiratory tract infection: a review of the continuing development of an innovative  
367 antimicrobial agent. *Journal of Antimicrobial Chemotherapy* **53 Suppl 1**:i3–20.
- 368 19. **World Health Organization.** 2015. 19th WHO Model List of Essential Medicines  
369 (April 2015). Geneva.
- 370 20. **Millan AS, Escudero JA, Gifford DR, Mazel D, MacLean RC.** 2016. Multicopy  
371 plasmids potentiate the evolution of antibiotic resistance in bacteria. *Nature Publishing*  
372 *Group* **1**:1–8.
- 373 21. **Ripoll A, Baquero F, Novais A, Rodriguez-Dominguez MJ, Turrientes MC,**  
374 **Cantón R, Galan JC.** 2011. In Vitro Selection of Variants Resistant to  $\beta$ -Lactams  
375 plus  $\beta$ -Lactamase Inhibitors in CTX-M  $\beta$ -Lactamases: Predicting the In Vivo Scenario?  
376 *Antimicrobial Agents and Chemotherapy* **55**:4530–4536.
- 377 22. **Gracia M, Ponte C, Soriano F.** 2005. Optimal co-amoxiclav ratios for inhibiting  
378 *Escherichia coli* strains with different susceptibilities to the compounds. *International*  
379 *Journal of Antimicrobial Agents* **25**:352–353.
- 380 23. **Asano K, Mizobuchi K.** 1998. Copy number control of IncIalpha plasmid ColIb-P9  
381 by competition between pseudoknot formation and antisense RNA binding at a  
382 specific RNA site. *The EMBO journal* **17**:5201–5213.
- 383 24. **Fernández L, Hancock REW.** 2012. Adaptive and mutational resistance: role of  
384 porins and efflux pumps in drug resistance. *Clinical Microbiology Reviews* **25**:661–  
385 681.
- 386 25. **Pena-Miller R, Laehnemann D, Jansen G, Fuentes-Hernandez A, Rosenstiel P,**  
387 **Schulenburg H, Beardmore R.** 2013. When the Most Potent Combination of  
388 Antibiotics Selects for the Greatest Bacterial Load: The Smile-Frown Transition. *Plos*  
389 *Biology* **11**:e1001540–13.

- 390 26. **Michel J-B, Yeh PJ, Chait R, Moellering RCJ, Kishony R.** 2008. Drug interactions  
391 modulate the potential for evolution of resistance. *Proceedings of the National*  
392 *Academy of Sciences* **105**:14918–14923.
- 393 27. **Munck C, Gumpert HK, Wallin AIN, Wang HH, Sommer MOA.** 2014. Prediction  
394 of resistance development against drug combinations by collateral responses to  
395 component drugs. *Science Translational Medicine* **6**:262ra156–262ra156.
- 396 28. **Bax R.** 2007. Development of a twice daily dosing regimen of amoxicillin/clavulanate.  
397 *International Journal of Antimicrobial Agents* **30**:118–121.
- 398 29. **Easton J, Noble S, Perry CM.** 2003. Amoxicillin/clavulanic acid: a review of its use  
399 in the management of paediatric patients with acute otitis media. *Drugs* **63**:311–340.
- 400 30. **Cottell JL, Webber MA, Coldham NG, Taylor DL, Cerdeño-Tárraga AM,**  
401 **Hauser H, Thomson NR, Woodward MJ, Piddock LJV.** 2011. Complete Sequence  
402 and Molecular Epidemiology of IncK Epidemic Plasmid Encoding blaCTX-M-14.  
403 *Emerging Infectious Diseases* **17**:645–652.
- 404 31. **Medaney F, Dimitriu T, Ellis RJ, Ben Raymond.** 2016. Live to cheat another day:  
405 bacterial dormancy facilitates the social exploitation of  $\beta$ -lactamases. *Isme*  
406 *Journal* **10**:778–787.
- 407 32. **Hutner SH, Provasoli L, Schatz A, Haskins C.** 1950. Approaches to the Study of the  
408 Role of Metals in the Metabolism of Microorganisms. *Proceedings of the American*  
409 *Philosophical Society*, 94 ed. 152–170.
- 410 33. **R Core Team.** 2015. R: A Language and Environment for Statistical Computing.
- 411 34. **Pinheiro JC, Bates D, DebRoy S, Sarkar D, R Core Team.** 2017. Linear and  
412 Nonlinear Mixed Effects Models [R package nlme version 3.1-131].
- 413 35. **Blattner FR, Plunkett G, Bloch CA, Perna NT, Burland V, Riley M, Collado-**  
414 **Vides J, Glasner JD, Rode CK, Mayhew GF, Gregor J, Davis NW, Kirkpatrick**  
415 **HA, Goeden MA, Rose DJ, Mau B, Shao Y.** 1997. The complete genome sequence  
416 of *Escherichia coli* K-12. *Science* **277**:1453–1462.
- 417 36. **Barrick JE, Colburn G, Deatherage DE, Traverse CC, Strand MD, Borges JJ,**  
418 **Knoester DB, Reba A, Meyer AG.** 2014. Identifying structural variation in haploid  
419 microbial genomes from short-read resequencing data using breseq. *BMC Genomics*  
420 **15**.

421
